# Supplementary material for: Chemotherapy-Induced IL34 Enhances Immunosuppression by Tumor-Associated Macrophages and Mediates Survival of Chemoresistant Lung Cancer Cells
Source: Oxford University Press journal article supplement (doi:10.1158/0008-5472.can-16-1170), 2016-08-22
Supplement: 00085472can161170-sup-165511_2_supp_3622041_3bsqby.pdf [file 00085472can161170-sup-165511_2_supp_3622041_3bsqby.pdf]

Supplementary figure 4

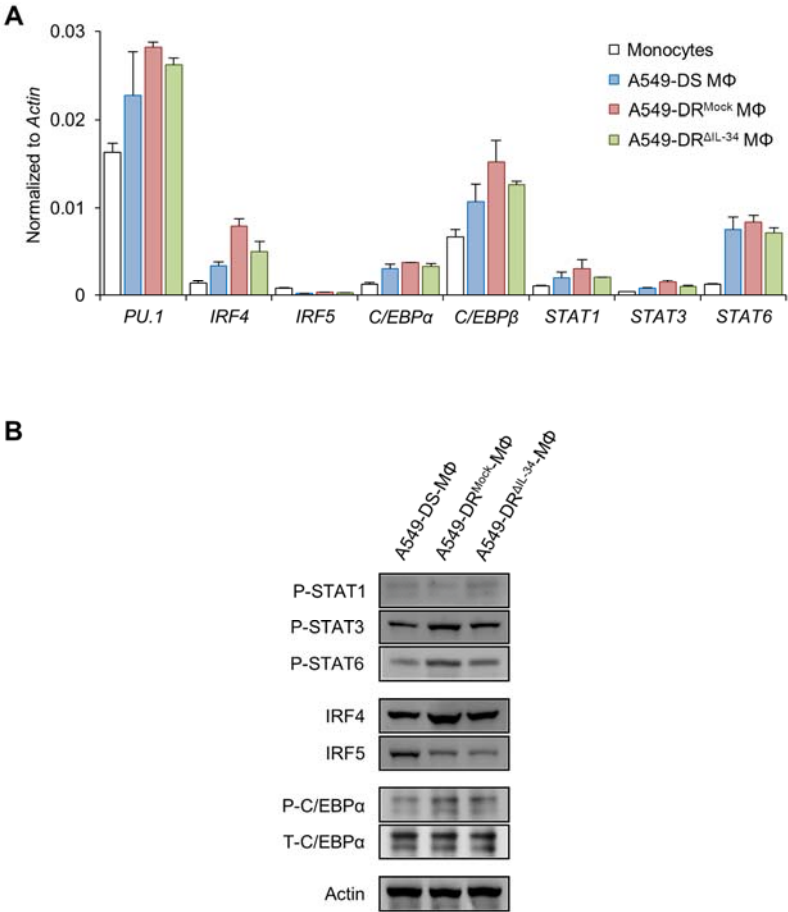

IL-34 effects on transcriptional control of TAMs. A, quantitative RT-PCR analysis for various transcription factors expression in monocytes differentiated into macrophages in the presence of A549-DS (A549-DS-MΦ), A549-DR<sup>Mock</sup> (A549-DR<sup>Mock</sup>-MΦ) or A549-DR<sup>ΔIL-34</sup> (A549-DR<sup>ΔIL-34</sup>-MΦ) supernatants at day 7 of culture. B, immunoblots for phospho-STAT1, phospho-STAT3, phospho-STAT-6, total-IRF4, total-IRF5, phospho-C/EBPα or total-C/EBPα in macrophages described in (A). β-Actin serves as a loading control.
